# Supplementary material
Source: MDPI journal article supplement (https://www.mdpi.com/2073-4395/11/7/1379)
Supplement: s1 [file s1]

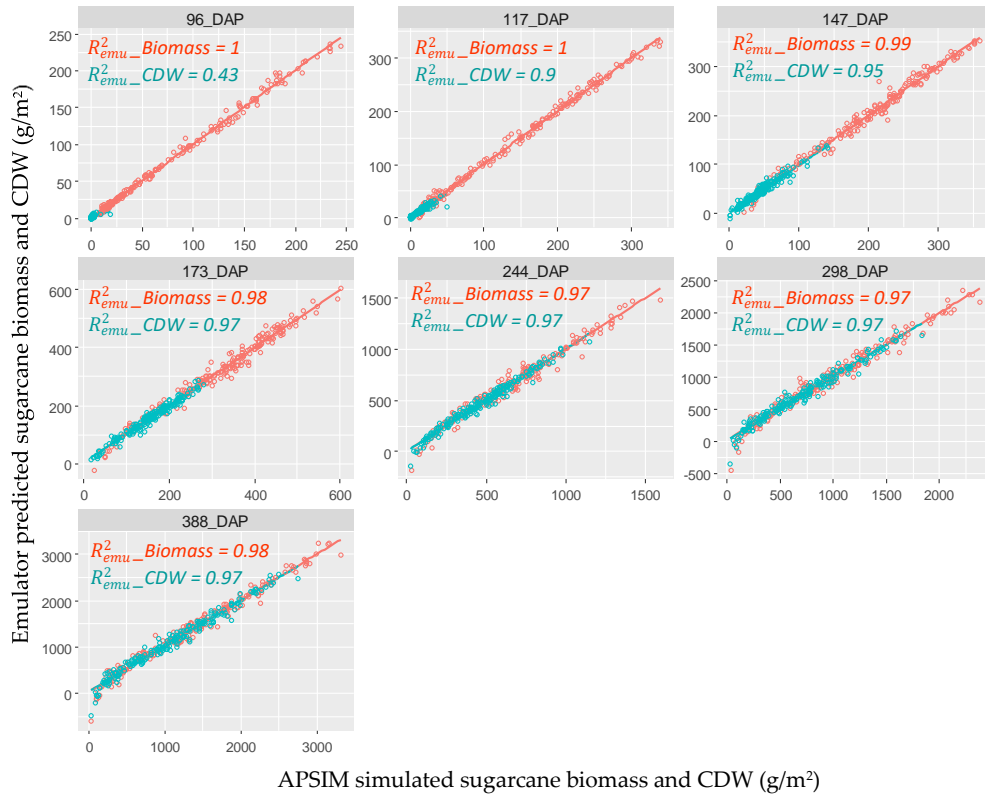

**Figure S1.** Relationship between APSIM-simulated values and emulator-predicted values of biomass and CDW in experiment A at each reporting frequency at days after planting (DAP): 96, 117, 147, 173, 244, 293 and 388. Solid lines indicate linear fit to the APSIM-simulated values and emulator-predicted values of biomass and CDW. —: Biomass and —: CDW.  $R^2_{emu\_Biomass}$  and  $R^2_{emu\_CDW}$  were calculated by using 200 data points.

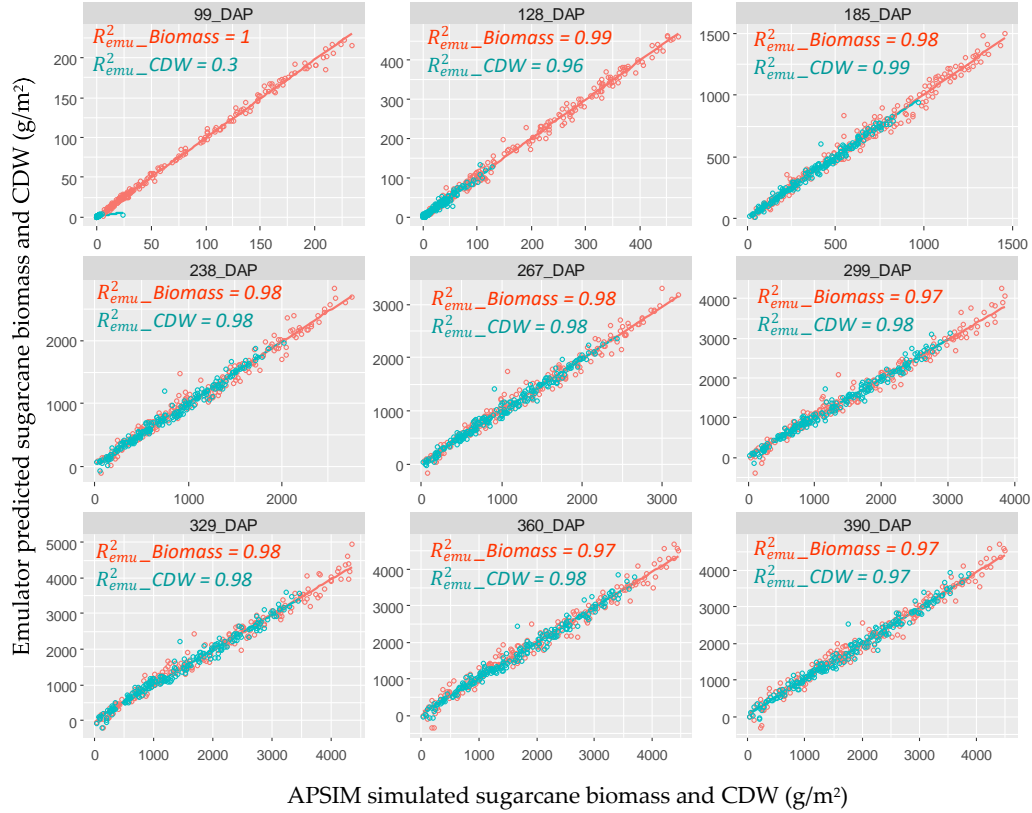

**Figure S2.** Relationship between APSIM-simulated values and emulator-predicted values of biomass and CDW in experiment B2 at each reporting frequency at days after planting (DAP): 99, 128, 185, 238, 267, 299, 329, 360 and 390. Solid lines indicate linear fit to the APSIM-simulated values and emulator-predicted values of biomass and CDW. —: Biomass and —: CDW.  $R^2_{emu\_Biomass}$  and  $R^2_{emu\_CDW}$  were calculated by using 200 data points.

**Table S1.** Summary of the data collected during field experiments.

| Experiment | Reporting Frequency<br>as DAP | Biomass (gm <sup>-2</sup> ) of Each Cultivar |         |          | CDW (gm <sup>-2</sup> ) of Each Cultivar |         |          |
|------------|-------------------------------|----------------------------------------------|---------|----------|------------------------------------------|---------|----------|
|            |                               | KK3                                          | LK92-11 | 02-2-058 | KK3                                      | LK92-11 | 02-2-058 |
| A          | 96                            | 34                                           | 37      | 38       | 22                                       | 23      | 26       |
|            | 117                           | 49                                           | 74      | 51       | 39                                       | 56      | 39       |
|            | 147                           | 255                                          | 372     | 271      | 188                                      | 251     | 195      |
|            | 173                           | 700                                          | 960     | 824      | 451                                      | 601     | 568      |
|            | 244                           | 2362                                         | 2580    | 1978     | 1676                                     | 1904    | 1340     |
|            | 298                           | 2902                                         | 2802    | 2228     | 2386                                     | 2410    | 1844     |
|            | 388                           | 3425                                         | 4705    | 3359     | 2623                                     | 4029    | 2527     |
| B1         | 99                            | 1000                                         | 160     | 540      | 260                                      | 83      | 90       |
|            | 128                           | 1370                                         | 1846    | 1140     | 529                                      | 573     | 480      |
|            | 185                           | 3820                                         | 2700    | 3210     | 2222                                     | 1300    | 1720     |
|            | 238                           | 4420                                         | 3890    | 3890     | 3030                                     | 2404    | 2460     |
|            | 267                           | 5120                                         | 4280    | 5180     | 3470                                     | 2730    | 3430     |
|            | 299                           | 5650                                         | 4510    | 4700     | 4545                                     | 3150    | 3500     |
|            | 329                           | 5390                                         | 4890    | 5550     | 4200                                     | 3920    | 4060     |
|            | 360                           | 6220                                         | 5070    | 6000     | 5010                                     | 3890    | 4400     |
|            | 390                           | 5850                                         | 4870    | 6470     | 4760                                     | 3610    | 4390     |
|            | 99                            | 170                                          | 220     | 220      | 30                                       | 30      | 40       |
| B2         | 128                           | 740                                          | 650     | 490      | 130                                      | 100     | 80       |
|            | 185                           | 1260                                         | 1130    | 1470     | 420                                      | 430     | 570      |
|            | 238                           | 2490                                         | 2780    | 2620     | 1550                                     | 1630    | 1440     |
|            | 267                           | 2810                                         | 2560    | 2700     | 1690                                     | 1540    | 1580     |
|            | 299                           | 3640                                         | 3410    | 3510     | 2460                                     | 2100    | 2380     |
|            | 329                           | 3860                                         | 3560    | 4790     | 2830                                     | 2380    | 3270     |
|            | 360                           | 4050                                         | 3790    | 4090     | 3110                                     | 2540    | 2890     |
|            | 390                           | 4830                                         | 3950    | 4180     | 3730                                     | 2760    | 2990     |

**Table S2.** Best estimated parameter ensembles obtained for biomass and CDW of cultivar KK3 based on the emulators of experiments A, B1 and B2.

| Parameter Name                  | Code | LK92-11 |        |         |        |         |        |
|---------------------------------|------|---------|--------|---------|--------|---------|--------|
|                                 |      | A       |        | B1      |        | B2      |        |
|                                 |      | Biomass | CDW    | Biomass | CDW    | Biomass | CDW    |
| <i>leaf_size</i>                | LS1  | 1723    | 1956   | 674     | 715    | 1792    | 1918   |
|                                 | LS2  | 68,040  | 68,539 | 26,182  | 44,747 | 56,809  | 41,153 |
|                                 | LS3  | 39,680  | 22,241 | 39,535  | 44,618 | 68,364  | 57,330 |
| <i>cane_fraction</i>            | CF   | 0.65    | 0.65   | 0.65    | 0.67   | 0.66    | 0.70   |
| <i>sucrose_fraction_stalk</i>   | SFS  | 0.7     | 0.7    | 0.6     | 0.6    | 0.6     | 0.6    |
| <i>stress_factor_stalk</i>      | SF   | 0.9     | 1.0    | 0.6     | 0.4    | 0.9     | 0.2    |
| <i>sucrose_delay</i>            | SD   | 591     | 557    | 583     | 29     | 563     | 531    |
| <i>min_sstem_sucrose</i>        | MSS  | 597     | 1358   | 1340    | 1310   | 1097    | 1317   |
| <i>min_sstem_sucrose_redn</i>   | MSSR | 1       | 0.03   | 2       | 19     | 0.26    | 6      |
| <i>tt_emerg_to_begcane</i>      | EB   | 1894    | 1883   | 1730    | 1264   | 1874    | 1889   |
| <i>tt_begcane_to_flowering</i>  | BF   | 6594    | 6576   | 5467    | 5851   | 5748    | 6569   |
| <i>tt_flowering_to_crop_end</i> | FC   | 1777    | 2220   | 1958    | 2105   | 2153    | 1776   |
| <i>green_leaf_no</i>            | GLN  | 15      | 15     | 10      | 12     | 15      | 15     |
| <i>tillerf_leaf_size</i>        | TLS1 | 5       | 6      | 5       | 4      | 4       | 5      |
|                                 | TLS2 | 6       | 6      | 6       | 3      | 4       | 5      |
|                                 | TLS3 | 6       | 2      | 1       | 3      | 1       | 2      |
|                                 | TLS4 | 6       | 6      | 5       | 1      | 5       | 5      |
|                                 | TLS5 | 3       | 4      | 3       | 5      | 3       | 1      |
| <i>transp_eff_cf</i>            | TEC1 | 0.006   | 0.007  | 0.008   | 0.012  | 0.014   | 0.013  |
|                                 | TEC2 | 0.012   | 0.009  | 0.010   | 0.007  | 0.014   | 0.011  |
|                                 | TEC3 | 0.014   | 0.013  | 0.014   | 0.012  | 0.013   | 0.014  |
|                                 | TEC4 | 0.014   | 0.014  | 0.013   | 0.014  | 0.009   | 0.008  |

|            |      |       |       |       |       |       |       |
|------------|------|-------|-------|-------|-------|-------|-------|
| <i>rue</i> | TEC5 | 0.013 | 0.013 | 0.014 | 0.011 | 0.013 | 0.011 |
|            | TEC6 | 0.008 | 0.007 | 0.010 | 0.007 | 0.014 | 0.007 |
|            | RUE3 | 1.42  | 1.32  | 2.49  | 2.13  | 2.24  | 2.04  |
|            | RUE4 | 2.49  | 2.50  | 2.28  | 2.19  | 2.34  | 2.29  |
|            | RUE5 | 2.50  | 2.42  | 2.40  | 0.81  | 2.40  | 1.31  |

**Table S3.** Best estimated parameter ensembles obtained for the biomass and CDW of cultivar LK92-11 from the emulators of experiments A, B1 and B2.

| Parameter Name                  | Code | 02-2-058 |        |         |        |         |        |
|---------------------------------|------|----------|--------|---------|--------|---------|--------|
|                                 |      | A        |        | B1      |        | B2      |        |
|                                 |      | Biomass  | CDW    | Biomass | CDW    | Biomass | CDW    |
| <i>leaf_size</i>                | LS1  | 1162     | 1527   | 1790    | 1524   | 1157    | 1300   |
|                                 | LS2  | 69,773   | 64,427 | 20,252  | 30,364 | 36,698  | 50,009 |
|                                 | LS3  | 32,932   | 43,031 | 61,664  | 20,906 | 25,688  | 52,774 |
| <i>cane_fraction</i>            | CF   | 0.72     | 0.77   | 0.68    | 0.74   | 0.73    | 0.67   |
| <i>sucrose_fraction_stalk</i>   | SFS  | 0.7      | 0.7    | 0.5     | 0.4    | 0.6     | 0.4    |
| <i>stress_factor_stalk</i>      | SF   | 0.8      | 0.7    | 0.9     | 0.9    | 1.0     | 0.9    |
| <i>sucrose_delay</i>            | SD   | 432      | 593    | 137     | 365    | 66      | 144    |
| <i>min_sstem_sucrose</i>        | MSS  | 597      | 402    | 1420    | 1356   | 811     | 1058   |
| <i>min_sstem_sucrose_redn</i>   | MSSR | 14       | 16     | 2       | 1      | 15      | 4      |
| <i>tt_emerg_to_begcane</i>      | EB   | 1888     | 1301   | 1397    | 1887   | 1574    | 1272   |
| <i>tt_begcane_to_flowering</i>  | BF   | 6365     | 6400   | 6523    | 5782   | 5428    | 5421   |
| <i>tt_flowering_to_crop_end</i> | FC   | 2002     | 2069   | 1794    | 2198   | 2014    | 2024   |
| <i>green_leaf_no</i>            | GLN  | 13       | 14     | 14      | 15     | 10      | 11     |
| <i>tillerf_leaf_size</i>        | TLS1 | 6        | 1      | 3       | 2      | 1       | 3      |
|                                 | TLS2 | 6        | 4      | 3       | 1      | 5       | 2      |
|                                 | TLS3 | 5        | 4      | 1       | 5      | 6       | 2      |
|                                 | TLS4 | 6        | 5      | 3       | 4      | 6       | 3      |
|                                 | TLS5 | 4        | 5      | 5       | 5      | 4       | 5      |
| <i>transp_eff_cf</i>            | TEC1 | 0.006    | 0.009  | 0.010   | 0.010  | 0.010   | 0.011  |
|                                 | TEC2 | 0.006    | 0.007  | 0.011   | 0.013  | 0.014   | 0.008  |
|                                 | TEC3 | 0.014    | 0.014  | 0.012   | 0.012  | 0.014   | 0.013  |
|                                 | TEC4 | 0.014    | 0.014  | 0.014   | 0.009  | 0.013   | 0.013  |
|                                 | TEC5 | 0.010    | 0.012  | 0.013   | 0.007  | 0.010   | 0.010  |
|                                 | TEC6 | 0.008    | 0.010  | 0.010   | 0.011  | 0.007   | 0.010  |
| <i>rue</i>                      | RUE3 | 1.54     | 1.56   | 2.49    | 1.88   | 2.31    | 2.40   |
|                                 | RUE4 | 2.07     | 2.46   | 2.48    | 2.26   | 2.37    | 2.33   |
|                                 | RUE5 | 2.48     | 2.27   | 1.84    | 0.88   | 1.03    | 0.78   |

**Table S4.** Best estimated parameter ensembles obtained for the biomass and CDW of cultivar 02-2-058 from the emulators of experiments A, B1 and B2.

| Parameter Name                  | Code | KK3     |        |         |        |         |        |
|---------------------------------|------|---------|--------|---------|--------|---------|--------|
|                                 |      | A       |        | B1      |        | B2      |        |
|                                 |      | Biomass | CDW    | Biomass | CDW    | Biomass | CDW    |
| <i>leaf_size</i>                | LS1  | 539     | 611    | 1566    | 1367   | 1872    | 1655   |
|                                 | LS2  | 63,615  | 65,516 | 62,686  | 51,527 | 66,206  | 25,114 |
|                                 | LS3  | 58,572  | 39,043 | 47,681  | 30,198 | 26,536  | 27,588 |
| <i>cane_fraction</i>            | CF   | 0.66    | 0.72   | 0.65    | 0.70   | 0.65    | 0.67   |
| <i>sucrose_fraction_stalk</i>   | SFS  | 0.6     | 0.4    | 0.7     | 0.7    | 0.6     | 0.7    |
| <i>stress_factor_stalk</i>      | SF   | 1.0     | 1.0    | 0.9     | 1.0    | 0.9     | 0.3    |
| <i>sucrose_delay</i>            | SD   | 79      | 106    | 582     | 502    | 255     | 400    |
| <i>min_sstem_sucrose</i>        | MSS  | 471     | 580    | 432     | 604    | 631     | 1355   |
| <i>min_sstem_sucrose_redn</i>   | MSSR | 20      | 16     | 19      | 19     | 6       | 3      |
| <i>tt_emerg_to_begcane</i>      | EB   | 1830    | 1545   | 1537    | 1226   | 1708    | 1729   |
| <i>tt_begcane_to_flowering</i>  | BF   | 6485    | 6405   | 5404    | 5462   | 6363    | 6515   |
| <i>tt_flowering_to_crop_end</i> | FC   | 2199    | 2240   | 2138    | 2189   | 2005    | 2217   |

|                          |      |       |       |       |       |       |       |
|--------------------------|------|-------|-------|-------|-------|-------|-------|
| <i>green_leaf_no</i>     | GLN  | 13    | 15    | 14    | 11    | 13    | 13    |
|                          | TLS1 | 1     | 4     | 5     | 4     | 5     | 5     |
|                          | TLS2 | 2     | 3     | 3     | 5     | 1     | 2     |
| <i>tillerf_leaf_size</i> | TLS3 | 5     | 2     | 1     | 1     | 2     | 6     |
|                          | TLS4 | 5     | 3     | 4     | 4     | 5     | 2     |
|                          | TLS5 | 5     | 5     | 3     | 2     | 2     | 5     |
| <i>transp_eff_cf</i>     | TEC1 | 0.014 | 0.009 | 0.008 | 0.008 | 0.013 | 0.013 |
|                          | TEC2 | 0.006 | 0.006 | 0.007 | 0.010 | 0.010 | 0.006 |
|                          | TEC3 | 0.013 | 0.013 | 0.013 | 0.011 | 0.014 | 0.006 |
|                          | TEC4 | 0.014 | 0.014 | 0.014 | 0.014 | 0.013 | 0.013 |
|                          | TEC5 | 0.007 | 0.014 | 0.014 | 0.009 | 0.006 | 0.009 |
|                          | TEC6 | 0.007 | 0.009 | 0.011 | 0.008 | 0.007 | 0.007 |
| <i>rue</i>               | RUE3 | 1.49  | 1.34  | 2.50  | 2.48  | 2.47  | 1.14  |
|                          | RUE4 | 2.29  | 2.49  | 2.46  | 2.48  | 1.66  | 2.50  |
|                          | RUE5 | 1.04  | 2.29  | 1.14  | 1.32  | 2.02  | 1.61  |
